# Supplementary material for: A lyotropic inverse ribbon phase in a branched-chain polyoxyethylene surfactant: pressure effects
Source: Royal Society of Chemistry journal article supplement (doi:10.1039/c0sm01524e), 2011-01-01
Supplement: c0sm01524e.pdf [file c0sm01524e.pdf]

## ***Electronic Supplementary Information***

### **A Lyotropic Inverse Ribbon Phase in a Branched-chain Polyoxyethylene Surfactant: Pressure Effects**

Gemma C. Shearman<sup>a</sup>, Nicholas J. Brooks<sup>a</sup>, Gordon J.T. Tiddy<sup>b</sup>, Michael Sztucki<sup>c</sup>, Richard H. Templer<sup>a</sup>, Robert V. Law<sup>a</sup>, Oscar Ces<sup>a</sup> and John M. Seddon<sup>\*a</sup>

<sup>a</sup> Department of Chemistry, Imperial College London, SW7 2AZ, U.K.

<sup>b</sup> School of Chemical Engineering & Analytical Science, University of Manchester, PO Box 88, Manchester, M60 1QD, U.K.

<sup>c</sup> ESRF, BP 220, F-38043, Grenoble, France

\* Email: [j.seddon@imperial.ac.uk](mailto:j.seddon@imperial.ac.uk)

## Wide-angle X-Ray Scattering (WAXS) Methodology

WAXS studies were performed using a Philips PW1140 fixed tube, line source X-ray generator system, which was fitted with a nickel filter and a quartz crystal monochromator in order to isolate  $\text{Cu-K}\alpha_1$  radiation ( $\lambda = 1.5405 \text{ \AA}$ ). All samples were prepared using the same method as for the small-angle X-ray scattering studies and then introduced into 1.5 mm thin-walled glass capillaries, which were both flame-sealed and sealed with silicone sealant to ensure that no dehydration occurred during examination. WAXS diffraction patterns were recorded onto Kodak Biomax MS autoradiography film using a Guinier camera. The temperature of the sample was controlled and maintained by a Thermo Haake DC50 heating circulator head combined with a Thermo Haake K20 refrigerator bath vessel and Haake based heat transfer fluid (SIL180), which was circulated about the sample holder via a heat exchanger block in order to achieve an accessible temperature range of  $-20 - 135 \text{ }^\circ\text{C}$ , with a sample temperature variation after stabilisation of approximately  $0.1 \text{ }^\circ\text{C}$ . X-ray films were scanned at high resolution using an Epson Perfection 4990 Photo scanner, and subsequently processed and analysed using 'AXcess', a software program developed in-house by Dr. A. Heron. The calibrant used for the WAXS measurements was silver behenate (with  $d_{001} = 58.38 \text{ \AA}$ ).

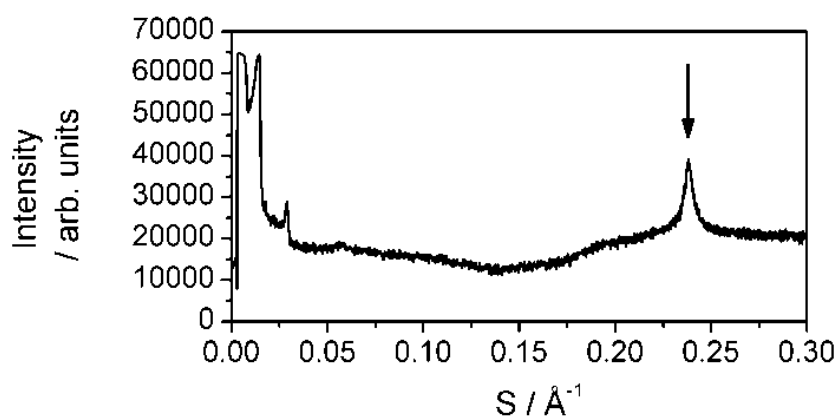

**Fig. S1** The WAXS diffraction pattern produced by  $\text{C}_{14}\text{C}_{16}\text{EO}_4 / 66 \text{ wt\%}$  water held at  $5^\circ\text{C}$ , showing a single sharp peak at  $4.20 \text{ \AA}$  signifying an  $\text{L}_\beta$  lamellar gel phase.

## Determination of the unit cell parameters for the inverse ribbon phase

The cell parameters of the inverse ribbon phase ( $a$  and  $b$ ) were determined from the Bragg peaks observed by using an iterative procedure written for usage in the IDL computing environment (ITT Visual Information Solutions). The main program 'cr\_powell' calls the function 'powcr', in which the values of all observed peaks must be input.

---

```
pro cr_powell, event

; defining the fractional tolerance
ftol = 1.0e-8
; define the starting point
; here these correspond to initial a and initial c values
P = [71, 83]
; Define the starting directional vectors in column format:
xi = TRANSPOSE([[1.0,0.0],[0.0,1.0]])
; minimise the function:
POWELL, P, xi, ftol, fmin, 'powcr'
; print the solution point:
print, 'a and b are: ', P
; print the value at the solution point - this is a least squares fit so should be as near 0 as possible
print, 'value at the solution point: ', fmin
end

; this is what you'll want to edit, notably changing the hkl if necessary (this shouldn't really be the
case)
; and change ep - the observed values that you obtained for each hkl
; note. if you don't have the exp value, then put 0 in. The program will then ignore it.

function powcr, X

; define a few Miller indices for 2d centred rectangular
hkl=intarr(2,5)
hkl=[[1,1],[0,2],[2,0],[2,2],[1,3]]
; define experimentally obtained lattice spacings
exp=[54.20,43.13,34.81,27.09,26.65]
; calculate the calculated values of the interplanar spacings
d=fltarr(5)
n=n_elements(d)
```

```
for i=0,n-1 do begin  
if exp[i] eq 0 then d[i]=0 else $  
d[i]=1/(SQRT(((hkl[0,i]^2)/(X[0]^2)) + ((hkl[1,i]^2)/(X[1]^2))))  
endfor  
difs=fltarr(5)  
sumdifs=0.0  
; calculate the sum of the differences between the calculated and observed values  
n=n_elements(exp)  
for i=0, n-1 do begin  
difs[i]=(d[i]-exp[i])^2  
sumdifs=sumdifs+difs[i]  
endfor  
return, sumdifs  
end
```
